# Supplementary material for: Sustainable activation of the PtCl n /Fe–N–C cathode for PEFCs through repeated subnanometer sizing and coarsening
Source: Royal Society of Chemistry journal article supplement (doi:10.1039/d5lf00185d), 2025-01-01
Supplement: d5lf00185d1.pdf [file d5lf00185d1.pdf]

# Supplementary Information

## Sustainable activation of the $\text{PtCl}_n/\text{Fe-N-C}$ cathode for PEFCs through repeated subnanometer sizing and coarsening

Hiroshi Yano

New Field Pioneering Division, Toyota Boshoku Corp., Kariya, Aichi 448-8651, Japan

Phone: +81 566 26 7714, Email: [hiroshi.yano@toyota-boshoku.com](mailto:hiroshi.yano@toyota-boshoku.com)

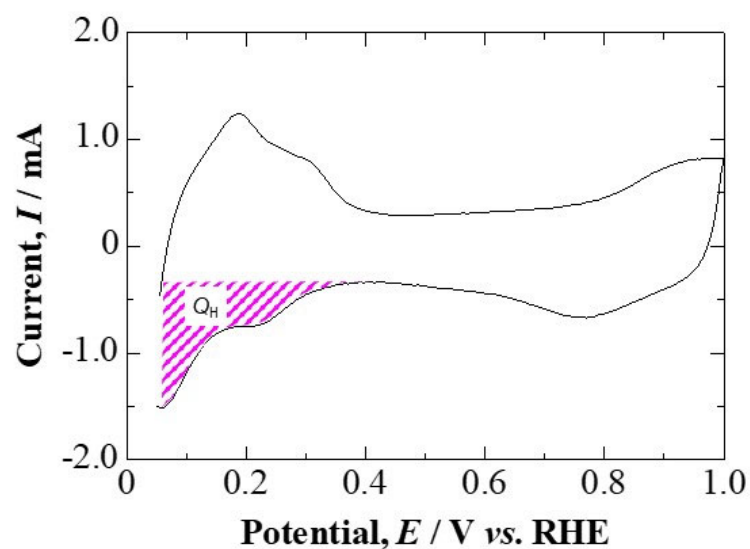

**Figure S1.** Cyclic voltammograms to determine the ECSA, at a Nafion-coated  $\text{PtCl}_n/\text{Fe-N-C}$  electrode in 0.1 M  $\text{HClO}_4$  solution purged with Ar at 30°C. Scan rate = 0.05  $\text{V s}^{-1}$ .

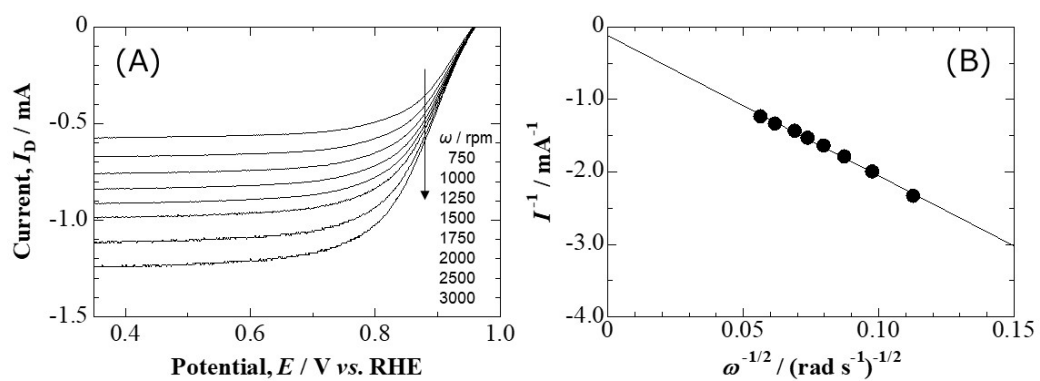

**Figure S2.** Hydrodynamic voltammograms for ORR in  $O_2$ -saturated 0.1 M  $HClO_4$  solution at a Nafion-coated  $PtCl_n/Fe-N-C$  electrode at 30 °C. (B) Koutecky-Levich plots at 0.85 V obtained from (A).

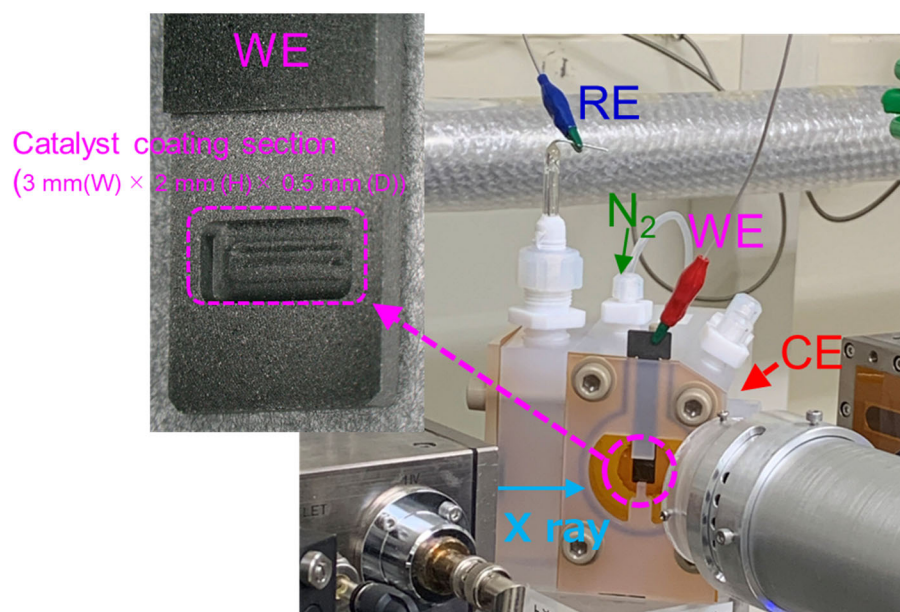

**Figure S3.** Electrochemical cell and working electrode (WE) for *in situ* XAFS measurements.

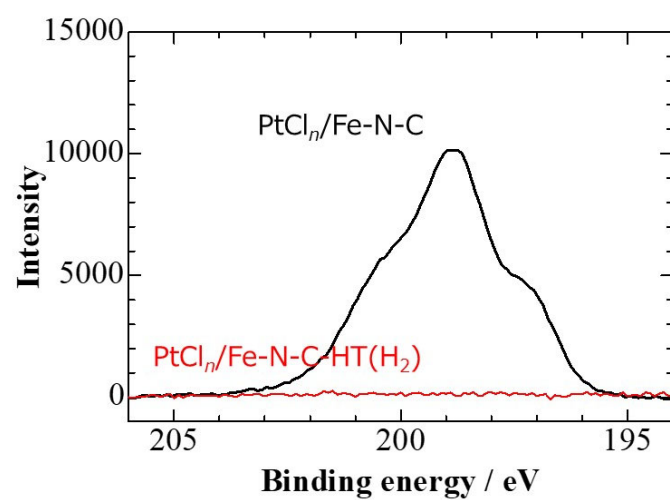

**Figure S4.** XPS Cl 2p spectra obtained for  $\text{PtCl}_n/\text{Fe-N-C}$  and  $\text{PtCl}_n/\text{Fe-N-C-HT(H}_2\text{)}$  powders.

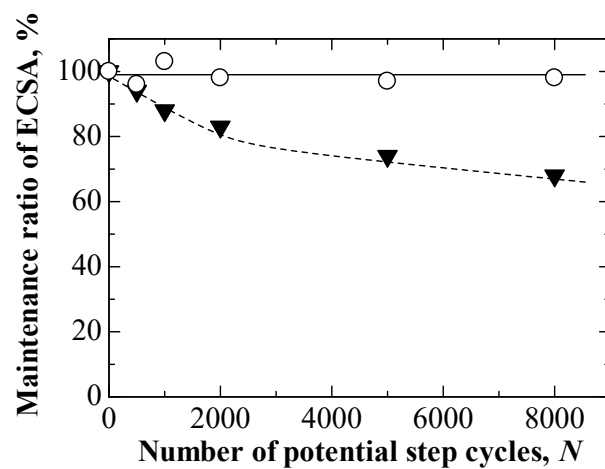

**Figure S5.** Change in ECSA value for the (○) PtCl<sub>n</sub>/Fe-N-C with 0.07 mgPt cm<sup>-2</sup> loading and (▼) commercial Pt/C with 0.14 mgPt cm<sup>-2</sup> loading cathode in single cell with 5 cm × 5 cm MEA. Cell temperature: 80°C. N<sub>2</sub> and H<sub>2</sub> humidifier temperature: 80°C. Cathode flow rate 0.8 L min<sup>-1</sup>; anode flow rate: 0.2 L min<sup>-1</sup>.

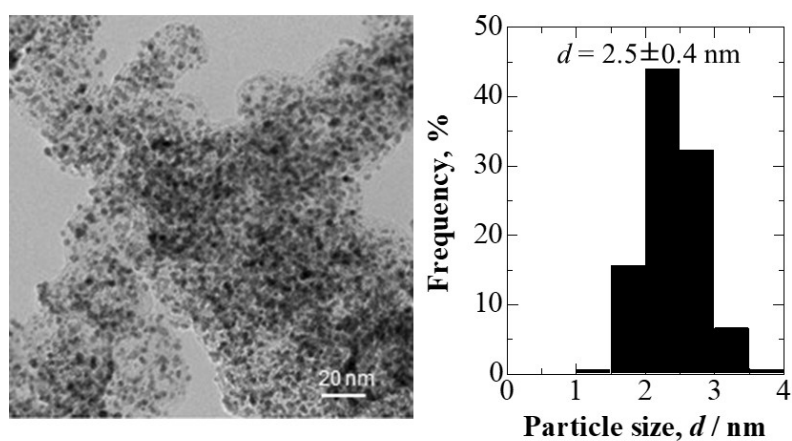

**Figure S6.** TEM image and particle size distribution histogram for commercial Pt/C.

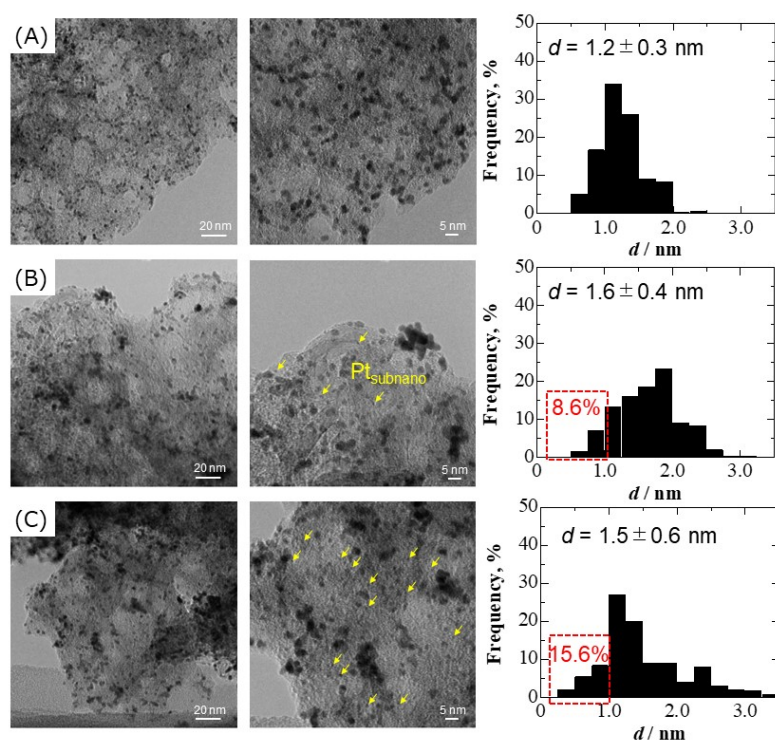

**Figure S7.** TEM images and particle size distribution histograms for  $(\text{PtCl}_n)_{0.9\text{nm}}/\text{Fe-N-C}$  electrode after in-situ XAFS measurement at (A)  $N = 0$ , (B)  $N = 25$ , and (C)  $N = 75$ .

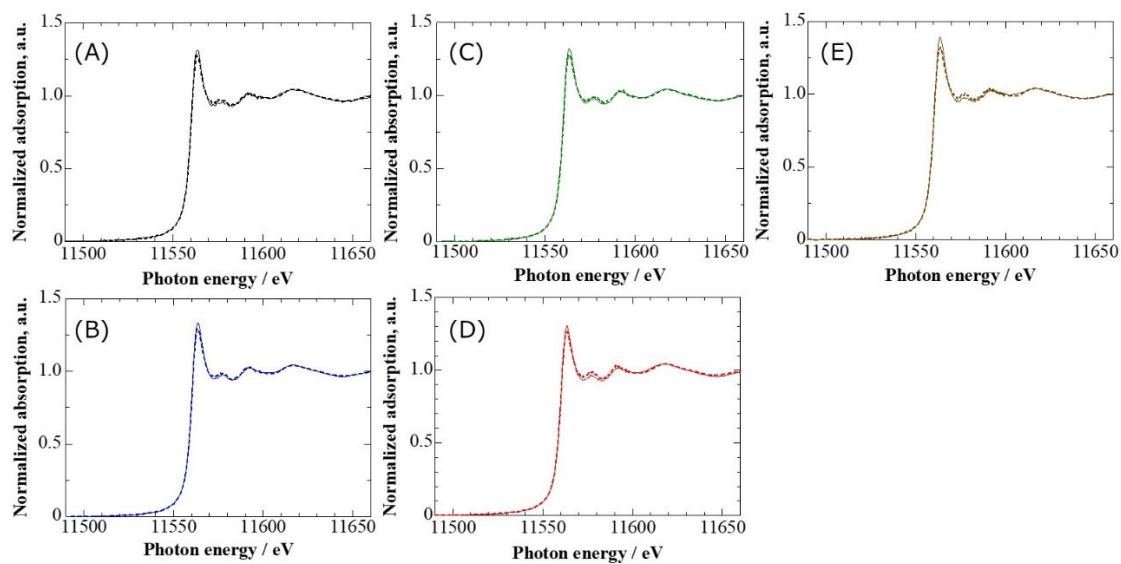

**Figure S8.** XANES spectra for  $(\text{PtCl}_n)_{0.9\text{nm}}/\text{Fe-N-C}$  electrode with (A)  $N = 0$ , (B)  $N = 5$ , (C)  $N = 25$ , and (D)  $N = 75$  and for the (E) commercial Pt/C electrode ( $N = 0$ ) at (----) 0.4 and (—) 1.0 V in  $\text{N}_2$ -purged 0.1 M  $\text{HClO}_4$ .

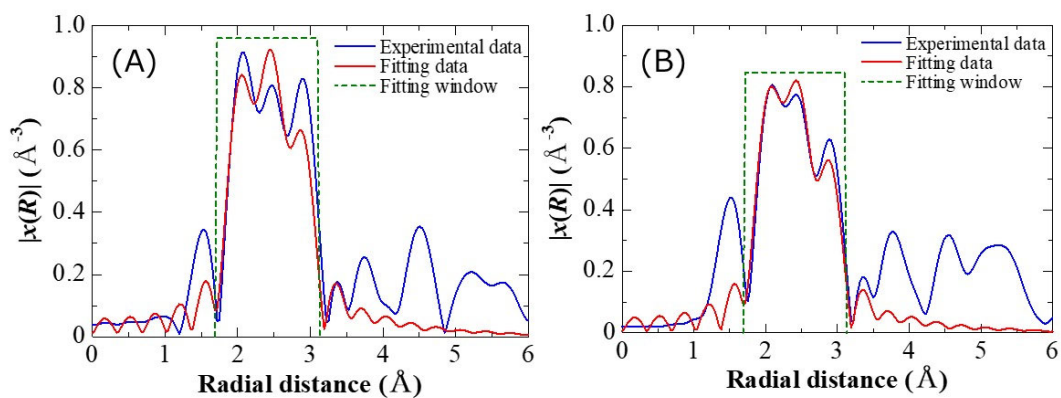

**Figure S9.** The EXAFS,  $\chi(R)$ , for  $\text{PtCl}_n/\text{Fe-N-C}$  electrode before ( $N = 0$ ) at the potential of (A) 0.4 V and (B) 1.0 V vs. RHE in 0.1 M  $\text{HClO}_4$  deaerated with  $\text{N}_2$ .

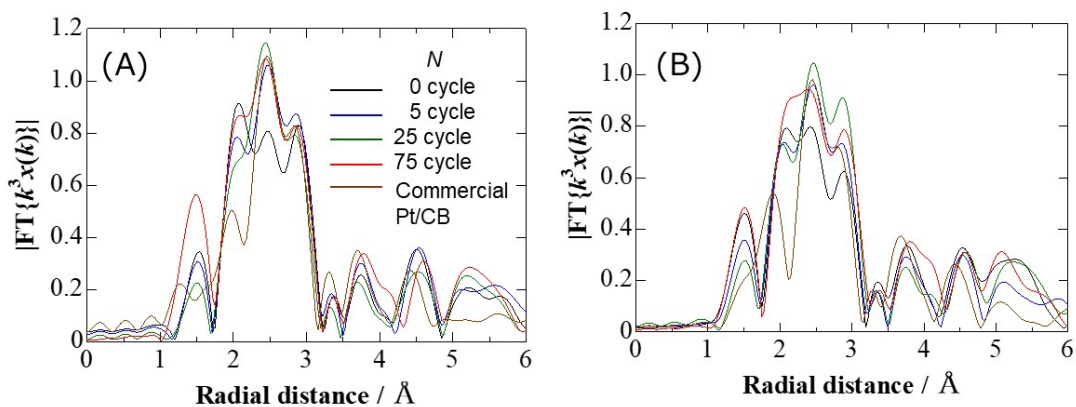

**Figure S10.** Pt- $L_3$  edge Fourier transformed EXAFS for  $(\text{PtCl}_n)_{0.9\text{nm}}/\text{Fe-N-C}$  electrode at  $N = 0$  and after  $N = 5, 25$ , and  $75$  cycles. EXAFS spectra acquired at potentials of (A) 0.4 V and (B) 1.0 V vs. RHE in 0.1 M  $\text{HClO}_4$  deaerated with  $\text{N}_2$ .

**Table S1.** EXAFS fitting results for Pt-Pt bond at 0.4 V

| $N$ (cycle)             | Path           | CN                             | $R$ (Å)                                | $\sigma^2$ (Å <sup>2</sup> )  | R factor |
|-------------------------|----------------|--------------------------------|----------------------------------------|-------------------------------|----------|
| 0                       | Pt-Pt<br>Pt-Cl | $6.1 \pm 1.0$<br>$1.4 \pm 0.5$ | $2.752 \pm 0.009$<br>$2.421 \pm 0.046$ | $0.0043 \pm 0.0009$<br>0.0040 | 0.037    |
| 5                       | Pt-Pt<br>Pt-Cl | $7.2 \pm 2.1$<br>$1.0 \pm 0.4$ | $2.748 \pm 0.004$<br>$2.418 \pm 0.027$ | $0.0041 \pm 0.0016$<br>0.0040 | 0.010    |
| 25                      | Pt-Pt<br>Pt-Cl | $8.7 \pm 2.3$<br>$0.7 \pm 0.5$ | $2.743 \pm 0.004$<br>$2.438 \pm 0.029$ | $0.0052 \pm 0.0015$<br>0.0040 | 0.007    |
| 75                      | Pt-Pt<br>Pt-Cl | $6.6 \pm 2.3$<br>$1.4 \pm 0.8$ | $2.746 \pm 0.008$<br>$2.440 \pm 0.028$ | $0.0039 \pm 0.0032$<br>0.0040 | 0.029    |
| 0<br>(commercial Pt/CB) | Pt-Pt          | $7.7 \pm 1.6$                  | $2.748 \pm 0.009$                      | $0.0043 \pm 0.0013$<br>0.0040 | 0.006    |

**Table S2.** EXAFS fitting results for Pt-Pt bond at 1.0 V

| $N$ (cycle)             | Path           | CN                             | $R$ (Å)                                | $\sigma^2$ (Å <sup>2</sup> )  | R factor |
|-------------------------|----------------|--------------------------------|----------------------------------------|-------------------------------|----------|
| 0                       | Pt-Pt<br>Pt-Cl | $5.9 \pm 2.3$<br>$1.3 \pm 0.4$ | $2.754 \pm 0.006$<br>$2.430 \pm 0.027$ | $0.0050 \pm 0.0022$<br>0.0040 | 0.045    |
| 5                       | Pt-Pt<br>Pt-Cl | $6.6 \pm 1.3$<br>$1.0 \pm 0.3$ | $2.751 \pm 0.003$<br>$2.431 \pm 0.012$ | $0.0043 \pm 0.0011$<br>0.0040 | 0.016    |
| 25                      | Pt-Pt<br>Pt-Cl | $8.4 \pm 1.7$<br>$0.7 \pm 0.3$ | $2.749 \pm 0.003$<br>$2.402 \pm 0.028$ | $0.0048 \pm 0.0012$<br>0.0040 | 0.008    |
| 75                      | Pt-Pt<br>Pt-Cl | $6.6 \pm 3.9$<br>$1.3 \pm 1.0$ | $2.750 \pm 0.010$<br>$2.441 \pm 0.032$ | $0.0046 \pm 0.0040$<br>0.0040 | 0.046    |
| 0<br>(commercial Pt/CB) | Pt-Pt          | $6.0 \pm 1.3$                  | $2.740 \pm 0.005$                      | $0.0036 \pm 0.0013$<br>0.0040 | 0.014    |
